# Supplementary material for: Occurrence of BMAA Isomers in Bloom-Impacted Lakes and Reservoirs of Brazil, Canada, France, Mexico, and the United Kingdom
Source: MDPI journal article supplement (doi:10.3390/toxins14040251), 2022-03-31
Supplement: s1 [file s1]

# Supplementary Materials: Occurrence of BMAA Isomers in Bloom-Impacted Lakes and Reservoirs of Brazil, Canada, France, Mexico, and the United Kingdom

Safa Abbes, Sung Vo Duy, Gabriel Munoz, Quoc Tuc Dinh, Dana F. Simon, Barry Husk, Helen M. Baulch, Brigitte Vinçon-Leite, Nathalie Fortin, Charles W. Greer, Megan L. Larsen, Jason J. Venkiteswaran, Felipe Fernando Martínez Jerónimo, Alessandra Giani, Chris D. Lowe, Nicolas Tromas and Sébastien Sauvé

**Text S1.** Analysis of total microcystins via Lemieux-von Rudloff oxidation.

Surface water samples from two high-intensity monitoring sites were also analyzed for total microcystins ( $\Sigma$ MC). The method was based on Lemieux-von Rudloff oxidation,<sup>1</sup> which generates 2-methyl-3-methoxy-4-phenylbutyric acid (MMPB) upon cleavage of the ADDA moiety common to most microcystins and nodularins. We used a previously optimized and validated method,<sup>2</sup> with minor modifications. Environmental water samples (freshwater lakes and reservoirs) were amended with potassium permanganate and sodium periodate (50 mM each) and adjusted to pH 9 using potassium carbonate. The oxidation reaction proceeded for 60 min under magnetic stirring, after which samples were quenched with sodium bisulfite. Samples were amended with the isotope-labeled internal standard (ILIS: D3-MMPB, 100 ng L<sup>-1</sup>) and passed through nylon filters (0.22  $\mu$ m). A 1-mL aliquot of the oxidized samples was analyzed by on-line solid-phase extraction (on-line SPE) coupled to ultra-high-performance liquid chromatography tandem mass spectrometry (Thermo TSQ Quantiva UHPLC-MS/MS). Details on the applied chromatographic gradient programs and other instrumental settings are provided in SI Table S2.

The method limit of detection (LOD) was 5 ng L<sup>-1</sup> in terms of  $\Sigma$ MC equivalents. A matrix-matched calibration curve (constructed in matrix-free lake water) was used for quantification, using spikes of a MC mixture before oxidation. We participated in a recreational water interlaboratory proficiency study with Abraxis/Eurofins. The determined  $\Sigma$ MC concentrations in the split samples analyzed by the in-house method was within  $\pm 30\%$  of the consensus value.

<sup>1</sup> Wu, X., Xiao, B., Li, R., Wang, Z., Chen, X., & Chen, X. (2009). Rapid quantification of total microcystins in cyanobacterial samples by periodate-permanganate oxidation and reversed-phase liquid chromatography. *Analytica Chimica Acta*, 651(2), 241-247.

<sup>2</sup> Munoz, G., Duy, S. V., Roy-Lachapelle, A., Husk, B., & Sauvé, S. (2017). Analysis of individual and total microcystins in surface water by on-line preconcentration and desalting coupled to liquid chromatography tandem mass spectrometry. *Journal of Chromatography A*, 1516, 9-20.

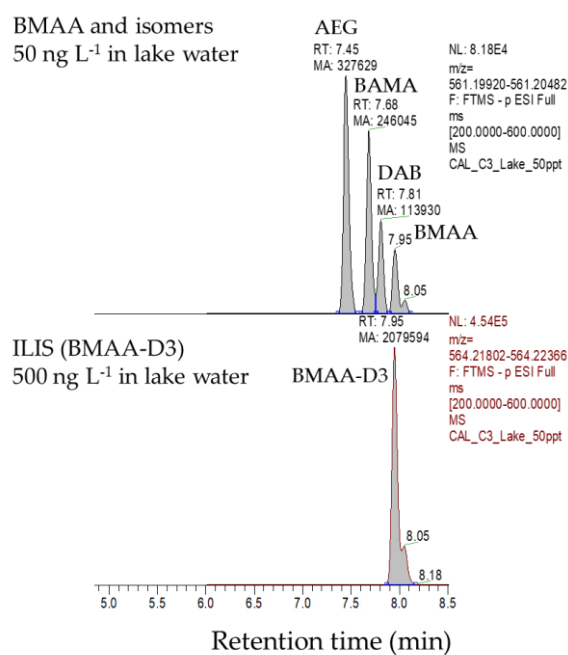

**Figure S1.** UHPLC-HRMS chromatograms of FMOC-derivatized BMAA isomers (AEG, BAMA, BMAA, and DAB) spiked at 50 ng L<sup>-1</sup> in blank lake water. The lower pane shows the corresponding isotope-labeled internal standard (ILIS: BMAA-D3) spiked at 500 ng L<sup>-1</sup>.

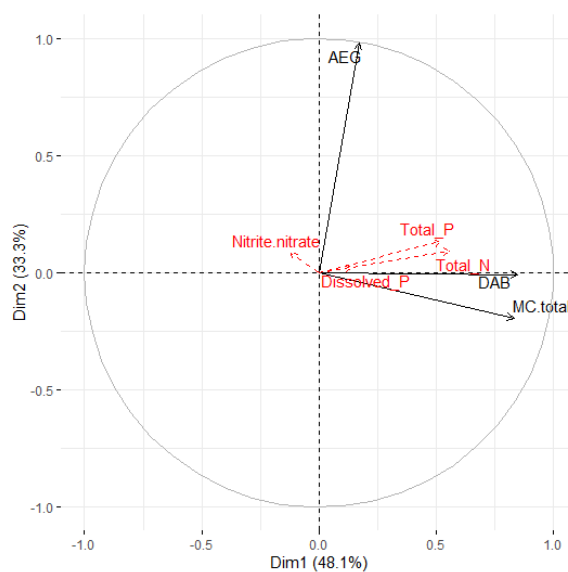

**Figure S2.** Principal component analysis (PCA) correlation circle of active variables (total MCs, AEG, DAB) and additional environmental variables superimposed on the plot (red font dotted arrows) for the PLSF site. The PCA is applied to a subset of  $n = 64$  samples (two outliers removed). Chlorophyll-a data were not available for all time points and therefore could not be included in the statistical analysis.

**Table S1.** Details on the UHPLC-HRMS instrumental method for the analysis of FMOC-derivatized BMAA and its isomers.

|                                     |                                                                                                                                                                                               |     |                          |
|-------------------------------------|-----------------------------------------------------------------------------------------------------------------------------------------------------------------------------------------------|-----|--------------------------|
| <b>Instrument</b>                   | <b>Thermo Q-Exactive Orbitrap mass spectrometer<br/>Dionex Ultimate 3400 UHPLC chain</b>                                                                                                      |     |                          |
| <b>Ionization</b>                   | Electrospray ionization source, negative ion mode                                                                                                                                             |     |                          |
| <b>Acquisition mode</b>             | Full Scan MS ( $m/z$ 200–600)                                                                                                                                                                 |     |                          |
| <b>Analytical column</b>            | Thermo Hypersil Gold C18 column (100 × 2.1 mm; 1.9 $\mu$ m)                                                                                                                                   |     |                          |
| <b>Column Temperature</b>           | 35°C                                                                                                                                                                                          |     |                          |
| <b>Analytical Mobile Phases</b>     | A: 2.5 mM ammonium acetate in HPLC-water<br>B: acetonitrile                                                                                                                                   |     |                          |
| <b>UHPLC gradient program</b>       | Time (min)                                                                                                                                                                                    | % B | Flow rate ( $\mu$ L/min) |
|                                     | 0.0                                                                                                                                                                                           | 25  | 450                      |
|                                     | 2.0                                                                                                                                                                                           | 25  | 450                      |
|                                     | 4.0                                                                                                                                                                                           | 40  | 450                      |
|                                     | 8.0                                                                                                                                                                                           | 50  | 450                      |
|                                     | 8.4                                                                                                                                                                                           | 95  | 450                      |
|                                     | 9.4                                                                                                                                                                                           | 95  | 450                      |
|                                     | 9.5                                                                                                                                                                                           | 25  | 450                      |
|                                     | 10                                                                                                                                                                                            | 25  | 450                      |
| <b>Injection Volume</b>             | 1000 $\mu$ L (on-line SPE)                                                                                                                                                                    |     |                          |
| <b>On-line SPE column</b>           | Thermo HyperSep Retain PEP column (20 mm × 2.1 mm, 40–60 $\mu$ m)                                                                                                                             |     |                          |
| <b>On-line SPE Mobile Phases</b>    | A: HPLC-water<br>B: acetonitrile                                                                                                                                                              |     |                          |
| <b>On-line SPE gradient program</b> | Time (min)                                                                                                                                                                                    | % B | Flow rate ( $\mu$ L/min) |
|                                     | 0.0                                                                                                                                                                                           | 0   | 1500                     |
|                                     | 2.0                                                                                                                                                                                           | 0   | 1500                     |
|                                     | 2.1                                                                                                                                                                                           | 100 | 1500                     |
|                                     | 6.9                                                                                                                                                                                           | 100 | 1500                     |
|                                     | 7.0                                                                                                                                                                                           | 0   | 1500                     |
|                                     | 10                                                                                                                                                                                            | 0   | 1500                     |
| <b>Source/gas parameters</b>        | Sheath gas flow rate 55<br>Aux gas flow rate 10<br>Sweep gas flow rate 0<br>Spray voltage (kV) -3.5<br>Capillary temperature (°C) 350<br>Vaporizer temperature (°C) 400<br>S-lens RF level 60 |     |                          |
| <b>Orbitrap parameters</b>          | Resolution setting of 70,000 FWHM at $m/z$ 200                                                                                                                                                |     |                          |

---

AGC target 3e6  
Maximum Inject Time (ms) 100

---

|                 |                   | <i>m/z</i> | Retention time (min) |
|-----------------|-------------------|------------|----------------------|
| Data processing | AEI (FMOC)        | 561.20201  | 7.45                 |
|                 | BAMA (FMOC)       | 561.20201  | 7.68                 |
|                 | BMAA (FMOC)       | 561.20201  | 7.95                 |
|                 | DAB (FMOC)        | 561.20201  | 7.81                 |
|                 | D3-BMAA<br>(FMOC) | 564.22084  | 7.95                 |

---

**Table S2.** Details on the UHPLC-MS/MS instrumental method for the analysis of total microcystins via oxidative cleavage (MMPB method).

| Instrument                   | Thermo TSQ Quantiva triple quadrupole mass spectrometer<br>Accela UHPLC chain                                                                                                               |     |                    |
|------------------------------|---------------------------------------------------------------------------------------------------------------------------------------------------------------------------------------------|-----|--------------------|
| Ionization                   | Electrospray ionization source, negative ion mode                                                                                                                                           |     |                    |
| Acquisition mode             | Selected reaction monitoring (SRM mode)                                                                                                                                                     |     |                    |
| Analytical column            | Thermo Hypersil Gold C18 column (50 × 2.1 mm; 1.9 µm)                                                                                                                                       |     |                    |
| Column Temperature           | 50°C                                                                                                                                                                                        |     |                    |
| Analytical Mobile Phases     | A: HPLC-water<br>B: methanol                                                                                                                                                                |     |                    |
| UHPLC gradient program       | Time (min)                                                                                                                                                                                  | % B | Flow rate (µL/min) |
|                              | 0.0                                                                                                                                                                                         | 60  | 500                |
|                              | 2.0                                                                                                                                                                                         | 60  | 500                |
|                              | 4.2                                                                                                                                                                                         | 100 | 500                |
|                              | 5.6                                                                                                                                                                                         | 100 | 500                |
|                              | 5.7                                                                                                                                                                                         | 60  | 500                |
|                              | 6.0                                                                                                                                                                                         | 60  | 500                |
| Injection Volume             | 1000 µL (on-line SPE)                                                                                                                                                                       |     |                    |
| On-line SPE column           | Thermo HyperSep Retain PEP column (20 mm × 2.1 mm, 40–60 µm)                                                                                                                                |     |                    |
| On-line SPE Mobile Phases    | A: HPLC-water + 0.5% formic acid<br>B: methanol + 0.5% formic acid                                                                                                                          |     |                    |
| On-line SPE gradient program | Time (min)                                                                                                                                                                                  | % B | Flow rate (µL/min) |
|                              | 0.0                                                                                                                                                                                         | 0   | 1000               |
|                              | 2.0                                                                                                                                                                                         | 0   | 1000               |
|                              | 2.1                                                                                                                                                                                         | 100 | 1500               |
|                              | 4.1                                                                                                                                                                                         | 100 | 1500               |
|                              | 4.2                                                                                                                                                                                         | 0   | 1500               |
|                              | 6.0                                                                                                                                                                                         | 0   | 1500               |
| Source/gas parameters        | Sheath gas pressure 35 a.u.<br>Aux gas pressure 15 a.u.<br>Sweep gas pressure 0 a.u.<br>Spray voltage (kV) -2.8<br>Ion transfer tube temperature (°C) 350<br>Vaporizer temperature (°C) 400 |     |                    |
| MS/MS acquisition parameters | Dwell time 30 ms<br>Q1 and Q3 operated at a resolution of 0.7 Da FWHM<br>Q2 collision gas (CID) pressure (mTorr) 1.5<br>Tube lens (V) 43<br>Collision energy (V) 12                         |     |                    |

---

|         | <i>MS/MS transition</i> | Retention time (min) |
|---------|-------------------------|----------------------|
| MMPB    | 207 → 131               | 2.90                 |
| D3-MMPB | 210 → 131               | 2.90                 |

---

**Table S3.** Measured concentrations (ng L<sup>-1</sup>) of AEG, BAMA, BMAA, and DAB in freshwater lakes and reservoirs samples, with or without amendment of 0.1M TCA.

|                 | AEG (ng L <sup>-1</sup> ) |          | BAMA (ng L <sup>-1</sup> ) |          | BMAA (ng L <sup>-1</sup> ) |          | DAB (ng L <sup>-1</sup> ) |          |
|-----------------|---------------------------|----------|----------------------------|----------|----------------------------|----------|---------------------------|----------|
|                 | Without TCA               | With TCA | Without TCA                | With TCA | Without TCA                | With TCA | Without TCA               | With TCA |
| TCA-test_SW-001 | ND                        | ND       | ND                         | ND       | ND                         | ND       | 177                       | 163      |
| TCA-test_SW-002 | 31                        | 92       | ND                         | 53       | ND                         | ND       | 54                        | 55       |
| TCA-test_SW-003 | 42                        | 52       | ND                         | 52       | ND                         | ND       | 51                        | 53       |
| TCA-test_SW-004 | ND                        | ND       | ND                         | ND       | ND                         | ND       | ND                        | ND       |
| TCA-test_SW-005 | ND                        | 12       | ND                         | ND       | ND                         | ND       | ND                        | 81       |
| TCA-test_SW-006 | ND                        | ND       | ND                         | ND       | ND                         | ND       | ND                        | ND       |
| TCA-test_SW-007 | ND                        | 6        | ND                         | ND       | ND                         | ND       | ND                        | 20       |
| TCA-test_SW-008 | ND                        | ND       | ND                         | ND       | ND                         | ND       | ND                        | ND       |
| TCA-test_SW-009 | 12                        | 8        | ND                         | ND       | ND                         | ND       | ND                        | 21       |
| TCA-test_SW-010 | ND                        | 15       | ND                         | ND       | ND                         | ND       | ND                        | 21       |
| TCA-test_SW-011 | ND                        | 225      | ND                         | ND       | ND                         | ND       | ND                        | ND       |
| TCA-test_SW-012 | ND                        | ND       | ND                         | ND       | ND                         | ND       | ND                        | 31       |
| TCA-test_SW-013 | ND                        | ND       | ND                         | ND       | ND                         | ND       | ND                        | 21       |
| TCA-test_SW-014 | ND                        | 55       | ND                         | ND       | ND                         | ND       | ND                        | 18       |
| TCA-test_SW-015 | 27                        | 64       | ND                         | ND       | ND                         | ND       | ND                        | 28       |
| TCA-test_SW-016 | ND                        | 7        | ND                         | ND       | ND                         | ND       | ND                        | ND       |
| TCA-test_SW-017 | ND                        | ND       | ND                         | ND       | ND                         | ND       | ND                        | 24       |
| TCA-test_SW-018 | ND                        | 15       | ND                         | 45       | ND                         | ND       | ND                        | 19       |
| TCA-test_SW-019 | 27                        | 43       | ND                         | ND       | ND                         | ND       | ND                        | 20       |
| TCA-test_SW-020 | ND                        | ND       | ND                         | ND       | ND                         | ND       | ND                        | 20       |
| TCA-test_SW-021 | ND                        | 21       | ND                         | ND       | ND                         | ND       | ND                        | 21       |
| TCA-test_SW-022 | ND                        | 34       | ND                         | ND       | ND                         | ND       | ND                        | ND       |
| TCA-test_SW-023 | ND                        | ND       | ND                         | ND       | ND                         | ND       | ND                        | 26       |
| TCA-test_SW-024 | ND                        | 518      | ND                         | ND       | ND                         | ND       | ND                        | ND       |
| TCA-test_SW-025 | ND                        | ND       | ND                         | ND       | ND                         | ND       | ND                        | 20       |
| TCA-test_SW-026 | ND                        | ND       | ND                         | ND       | ND                         | ND       | ND                        | ND       |
| TCA-test_SW-027 | ND                        | ND       | ND                         | ND       | ND                         | ND       | ND                        | ND       |
| TCA-test_SW-028 | ND                        | ND       | ND                         | ND       | ND                         | ND       | 43                        | 70       |
| TCA-test_SW-029 | ND                        | ND       | ND                         | ND       | ND                         | ND       | 46                        | 51       |
| TCA-test_SW-030 | ND                        | ND       | ND                         | ND       | ND                         | ND       | 51                        | 66       |
| TCA-test_SW-031 | ND                        | 34       | ND                         | ND       | ND                         | ND       | ND                        | ND       |
| TCA-test_SW-032 | ND                        | 72       | ND                         | ND       | ND                         | ND       | ND                        | ND       |
| TCA-test_SW-033 | ND                        | ND       | ND                         | ND       | ND                         | ND       | ND                        | ND       |
| TCA-test_SW-034 | ND                        | ND       | ND                         | ND       | ND                         | ND       | 47                        | 52       |
| TCA-test_SW-035 | ND                        | ND       | ND                         | ND       | ND                         | ND       | 51                        | 67       |
| TCA-test_SW-036 | ND                        | ND       | ND                         | ND       | ND                         | ND       | ND                        | ND       |
| TCA-test_SW-037 | ND                        | ND       | ND                         | 29       | ND                         | ND       | ND                        | 32       |
| TCA-test_SW-038 | ND                        | ND       | ND                         | ND       | ND                         | ND       | 85                        | 64       |
| TCA-test_SW-039 | ND                        | ND       | ND                         | ND       | ND                         | ND       | ND                        | 53       |
| TCA-test_SW-040 | ND                        | 35       | ND                         | ND       | ND                         | ND       | ND                        | ND       |
| TCA-test_SW-041 | ND                        | ND       | ND                         | ND       | ND                         | ND       | ND                        | ND       |
| TCA-test_SW-042 | ND                        | ND       | ND                         | ND       | ND                         | ND       | ND                        | ND       |



|                 |    |     |    |    |    |    |     |     |
|-----------------|----|-----|----|----|----|----|-----|-----|
| TCA-test_SW-043 | ND | ND  | ND | ND | ND | ND | ND  | ND  |
| TCA-test_SW-044 | ND | ND  | ND | ND | ND | ND | ND  | ND  |
| TCA-test_SW-045 | ND | ND  | ND | ND | ND | ND | ND  | ND  |
| TCA-test_SW-046 | ND | ND  | ND | ND | ND | ND | ND  | 109 |
| TCA-test_SW-047 | ND | ND  | ND | ND | ND | ND | ND  | ND  |
| TCA-test_SW-048 | ND | ND  | ND | ND | ND | ND | 34  | 45  |
| TCA-test_SW-049 | 83 | 74  | ND | ND | ND | ND | ND  | ND  |
| TCA-test_SW-050 | ND | ND  | ND | ND | ND | ND | ND  | ND  |
| TCA-test_SW-051 | ND | ND  | ND | ND | ND | ND | ND  | ND  |
| TCA-test_SW-052 | ND | ND  | ND | ND | ND | ND | 178 | 208 |
| TCA-test_SW-053 | ND | ND  | ND | ND | ND | ND | ND  | 45  |
| TCA-test_SW-054 | ND | ND  | ND | ND | ND | ND | ND  | ND  |
| TCA-test_SW-055 | ND | 10  | ND | ND | ND | ND | ND  | 55  |
| TCA-test_SW-056 | ND | ND  | ND | ND | ND | ND | 32  | 45  |
| TCA-test_SW-057 | ND | ND  | ND | ND | ND | ND | ND  | ND  |
| TCA-test_SW-058 | ND | ND  | ND | ND | ND | ND | 19  | 27  |
| TCA-test_SW-059 | ND | ND  | ND | ND | ND | ND | ND  | ND  |
| TCA-test_SW-060 | ND | ND  | ND | ND | ND | ND | ND  | ND  |
| TCA-test_SW-061 | ND | ND  | ND | ND | ND | ND | ND  | ND  |
| TCA-test_SW-062 | 51 | 78  | ND | ND | ND | ND | 35  | 50  |
| TCA-test_SW-063 | ND | 33  | ND | ND | ND | ND | ND  | ND  |
| TCA-test_SW-064 | ND | 37  | ND | ND | ND | ND | ND  | ND  |
| TCA-test_SW-065 | ND | ND  | ND | ND | ND | ND | ND  | ND  |
| TCA-test_SW-066 | ND | 39  | ND | ND | ND | ND | ND  | 15  |
| TCA-test_SW-067 | ND | ND  | ND | ND | ND | ND | 72  | 255 |
| TCA-test_SW-068 | ND | ND  | ND | ND | ND | ND | ND  | ND  |
| TCA-test_SW-069 | 47 | ND  | ND | ND | ND | ND | 75  | 52  |
| TCA-test_SW-070 | 81 | 432 | ND | ND | ND | ND | 139 | 117 |
| TCA-test_SW-071 | 22 | 99  | ND | 16 | ND | ND | ND  | 37  |
| TCA-test_SW-072 | 18 | 144 | ND | 50 | ND | ND | ND  | ND  |
| TCA-test_SW-073 | 64 | 233 | 57 | 43 | ND | ND | 86  | 111 |
| TCA-test_SW-074 | ND | 58  | 21 | ND | ND | ND | 49  | 61  |
| TCA-test_SW-075 | ND | 38  | ND | ND | ND | ND | 32  | 66  |
| TCA-test_SW-076 | 57 | 71  | ND | 33 | ND | ND | 56  | 59  |
| TCA-test_SW-077 | 24 | 100 | ND | 53 | ND | ND | 62  | 85  |
| TCA-test_SW-078 | 35 | 62  | ND | 53 | ND | ND | 34  | 95  |
| TCA-test_SW-079 | ND | 49  | ND | ND | ND | ND | ND  | ND  |
| TCA-test_SW-080 | 76 | 158 | ND | 38 | ND | ND | 112 | 81  |
| TCA-test_SW-081 | 69 | 131 | ND | 33 | ND | ND | 79  | 83  |
| TCA-test_SW-082 | ND | 75  | ND | 31 | ND | ND | ND  | 66  |
| TCA-test_SW-083 | 28 | 94  | ND | 56 | ND | ND | ND  | 64  |
| TCA-test_SW-084 | 22 | 71  | ND | 53 | ND | ND | 43  | 59  |
| TCA-test_SW-085 | 45 | 192 | 57 | 53 | ND | ND | 73  | 119 |
| TCA-test_SW-086 | 29 | 54  | ND | 24 | ND | ND | 49  | 55  |
| TCA-test_SW-087 | 59 | 172 | 59 | 54 | ND | ND | 87  | 78  |
| TCA-test_SW-088 | ND | ND  | ND | ND | ND | ND | 11  | 27  |

|                 |      |       |    |    |    |    |     |     |
|-----------------|------|-------|----|----|----|----|-----|-----|
| TCA-test_SW-089 | ND   | ND    | ND | ND | ND | ND | ND  | ND  |
| TCA-test_SW-090 | ND   | ND    | ND | ND | ND | ND | 10  | 16  |
| TCA-test_SW-091 | ND   | ND    | ND | ND | ND | ND | ND  | 12  |
| TCA-test_SW-092 | ND   | ND    | ND | ND | ND | ND | ND  | ND  |
| TCA-test_SW-093 | 3591 | 18814 | ND | ND | ND | ND | ND  | ND  |
| TCA-test_SW-094 | ND   | 37    | ND | 33 | ND | ND | ND  | 57  |
| TCA-test_SW-095 | ND   | ND    | ND | ND | ND | ND | 133 | 136 |
| TCA-test_SW-096 | ND   | ND    | ND | ND | ND | ND | ND  | ND  |
| TCA-test_SW-097 | 5    | 35    | ND | 52 | ND | ND | ND  | ND  |
| TCA-test_SW-098 | ND   | 35    | ND | ND | ND | ND | ND  | ND  |
| TCA-test_SW-099 | ND   | ND    | ND | ND | ND | ND | ND  | 27  |
| TCA-test_SW-100 | ND   | 58    | ND | ND | ND | ND | ND  | ND  |
| TCA-test_SW-101 | ND   | ND    | ND | ND | ND | ND | ND  | ND  |
| TCA-test_SW-102 | ND   | ND    | ND | ND | ND | ND | ND  | ND  |
| TCA-test_SW-103 | ND   | 11    | ND | ND | ND | ND | ND  | 30  |
| TCA-test_SW-104 | ND   | 16    | ND | ND | ND | ND | ND  | 33  |
| TCA-test_SW-105 | 15   | 20    | ND | ND | ND | ND | 39  | 27  |
| TCA-test_SW-106 | ND   | ND    | ND | ND | ND | ND | 43  | 49  |
| TCA-test_SW-107 | 5    | 43    | ND | ND | ND | ND | ND  | 52  |
| TCA-test_SW-108 | ND   | ND    | ND | ND | ND | ND | ND  | ND  |
| TCA-test_SW-109 | ND   | 34    | ND | ND | ND | ND | ND  | 53  |
| TCA-test_SW-110 | ND   | ND    | ND | ND | ND | ND | ND  | ND  |
| TCA-test_SW-111 | ND   | ND    | ND | ND | ND | ND | ND  | ND  |
| TCA-test_SW-112 | ND   | ND    | ND | ND | ND | ND | ND  | ND  |
| TCA-test_SW-113 | ND   | 33    | ND | ND | ND | ND | ND  | ND  |
| TCA-test_SW-114 | ND   | ND    | ND | ND | ND | ND | ND  | 18  |
| TCA-test_SW-115 | ND   | ND    | ND | ND | ND | ND | 25  | 32  |
| TCA-test_SW-116 | ND   | ND    | ND | ND | ND | ND | 113 | 237 |
| TCA-test_SW-117 | ND   | ND    | ND | ND | ND | ND | 10  | 58  |
| TCA-test_SW-118 | ND   | ND    | ND | ND | ND | ND | ND  | 29  |
| TCA-test_SW-119 | ND   | 34    | ND | ND | ND | ND | 330 | 359 |
| TCA-test_SW-120 | 28   | 65    | ND | ND | ND | ND | ND  | ND  |
| TCA-test_SW-121 | ND   | ND    | ND | ND | ND | ND | 12  | 22  |
| TCA-test_SW-122 | ND   | ND    | ND | ND | ND | ND | 14  | 30  |
| TCA-test_SW-123 | ND   | ND    | ND | 45 | ND | ND | 42  | 39  |
| TCA-test_SW-124 | ND   | ND    | ND | ND | ND | ND | 41  | 35  |
| TCA-test_SW-125 | 139  | 133   | ND | 53 | ND | ND | 78  | 105 |
| TCA-test_SW-126 | ND   | ND    | ND | ND | ND | ND | 16  | 32  |
| TCA-test_SW-127 | ND   | ND    | ND | ND | ND | ND | 79  | 181 |
| TCA-test_SW-128 | ND   | ND    | ND | ND | ND | ND | 107 | 171 |
| TCA-test_SW-129 | ND   | 35    | ND | ND | ND | ND | ND  | ND  |
| TCA-test_SW-130 | ND   | ND    | ND | ND | ND | ND | ND  | ND  |
| TCA-test_SW-131 | ND   | ND    | ND | ND | ND | ND | 46  | 45  |
| TCA-test_SW-132 | ND   | ND    | ND | ND | ND | ND | 20  | 32  |
| TCA-test_SW-133 | ND   | 51    | ND | ND | ND | ND | 13  | 201 |
| TCA-test_SW-134 | ND   | 49    | ND | 55 | ND | ND | 89  | 87  |

|                 |    |     |    |    |    |    |     |      |
|-----------------|----|-----|----|----|----|----|-----|------|
| TCA-test_SW-135 | ND | ND  | ND | ND | ND | ND | ND  | ND   |
| TCA-test_SW-136 | ND | ND  | ND | ND | ND | ND | ND  | 53   |
| TCA-test_SW-137 | ND | 34  | ND | ND | ND | ND | ND  | ND   |
| TCA-test_SW-138 | ND | ND  | ND | ND | ND | ND | ND  | ND   |
| TCA-test_SW-139 | ND | ND  | ND | ND | ND | ND | ND  | ND   |
| TCA-test_SW-140 | ND | ND  | ND | ND | ND | ND | ND  | 56   |
| TCA-test_SW-141 | ND | ND  | ND | ND | ND | ND | ND  | ND   |
| TCA-test_SW-142 | ND | ND  | ND | ND | ND | ND | 24  | 88   |
| TCA-test_SW-143 | ND | 178 | ND | ND | ND | ND | 81  | 230  |
| TCA-test_SW-144 | ND | ND  | ND | ND | ND | ND | ND  | ND   |
| TCA-test_SW-145 | ND | 7   | ND | ND | ND | ND | ND  | ND   |
| TCA-test_SW-146 | ND | ND  | ND | ND | ND | ND | ND  | ND   |
| TCA-test_SW-147 | ND | ND  | ND | ND | ND | ND | ND  | ND   |
| TCA-test_SW-148 | ND | ND  | ND | ND | ND | ND | ND  | ND   |
| TCA-test_SW-149 | ND | ND  | ND | ND | ND | ND | ND  | ND   |
| TCA-test_SW-150 | ND | ND  | ND | ND | ND | ND | 610 | 1261 |
| TCA-test_SW-151 | ND | ND  | ND | ND | ND | ND | 45  | 46   |
| TCA-test_SW-152 | ND | 7   | ND | ND | ND | ND | ND  | 19   |
| TCA-test_SW-153 | ND | ND  | ND | ND | ND | ND | ND  | 35   |
| TCA-test_SW-154 | ND | ND  | ND | ND | ND | ND | ND  | 28   |
| TCA-test_SW-155 | 5  | ND  | ND | ND | ND | ND | ND  | 23   |
| TCA-test_SW-156 | 28 | 20  | ND | ND | ND | ND | ND  | 36   |
| TCA-test_SW-157 | ND | 6   | ND | ND | ND | ND | ND  | 23   |
| TCA-test_SW-158 | ND | ND  | ND | ND | ND | ND | 32  | 39   |

ND: Non-detect data. Limits of detection were 5 ng L<sup>-1</sup> for AEG and 10 ng L<sup>-1</sup> for BAMA, BMAA, and DAB.
